# Supplementary material for: Diffusive flux of nanoparticles through chemically modified alumina membranes
Source: Royal Society of Chemistry journal article supplement (doi:10.1039/c1an15448f), 2011-01-01
Supplement: c1an15448f.pdf [file c1an15448f.pdf]

Supporting information for

# Diffusive Flux of Nanoparticles Through Porous Membranes with Chemically Modified Surfaces

*Jason R. Stephens, Jacob S. Beveridge and Mary Elizabeth Williams\**

Department of Chemistry, 104 Chemistry Building, The Pennsylvania State University,  
University Park, Pennsylvania, 16802

**Figure S1.** (A, B, C) Transmission electron microscopy images of the  $\text{CoFe}_2\text{O}_4$  nanoparticles used in these studies. Scale bar is 50 nm (D) absorbance spectra of the three nanoparticle samples in hexane.

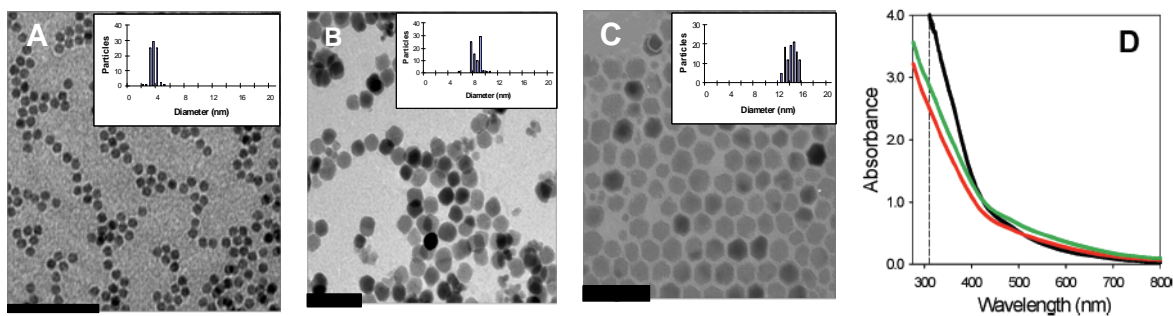

**Figure S2** FTIR spectra of the silane-modified alumina membranes. **(A)** C<sub>6</sub> chain, **(B)** C<sub>12</sub> chain, **(C)** C<sub>18</sub> chain, **(D)**, NH<sub>2</sub> terminated **(E)** Br terminated, and **(F)** COOH terminated.

In spectra A – C, a strong C-H stretch is observed (C<sub>6</sub>: 2896 and 2769 cm<sup>-1</sup>; C<sub>12</sub>: 2924 and 2854 cm<sup>-1</sup>; C<sub>18</sub>: 2927 and 2859 cm<sup>-1</sup>). In spectrum D a stretch is observed at 3109 cm<sup>-1</sup> indicative of N-H, and a band at 1192 cm<sup>-1</sup> corresponds to C-N. In spectrum E, the bromine gives rise to a strong stretch at 843 cm<sup>-1</sup>. Spectrum F contains C-H stretches and at 1692 cm<sup>-1</sup> a strong, defined stretch at 1692 cm<sup>-1</sup>. Also at 1299, a medium stretch is observed for C-O at 1299 cm<sup>-1</sup>.

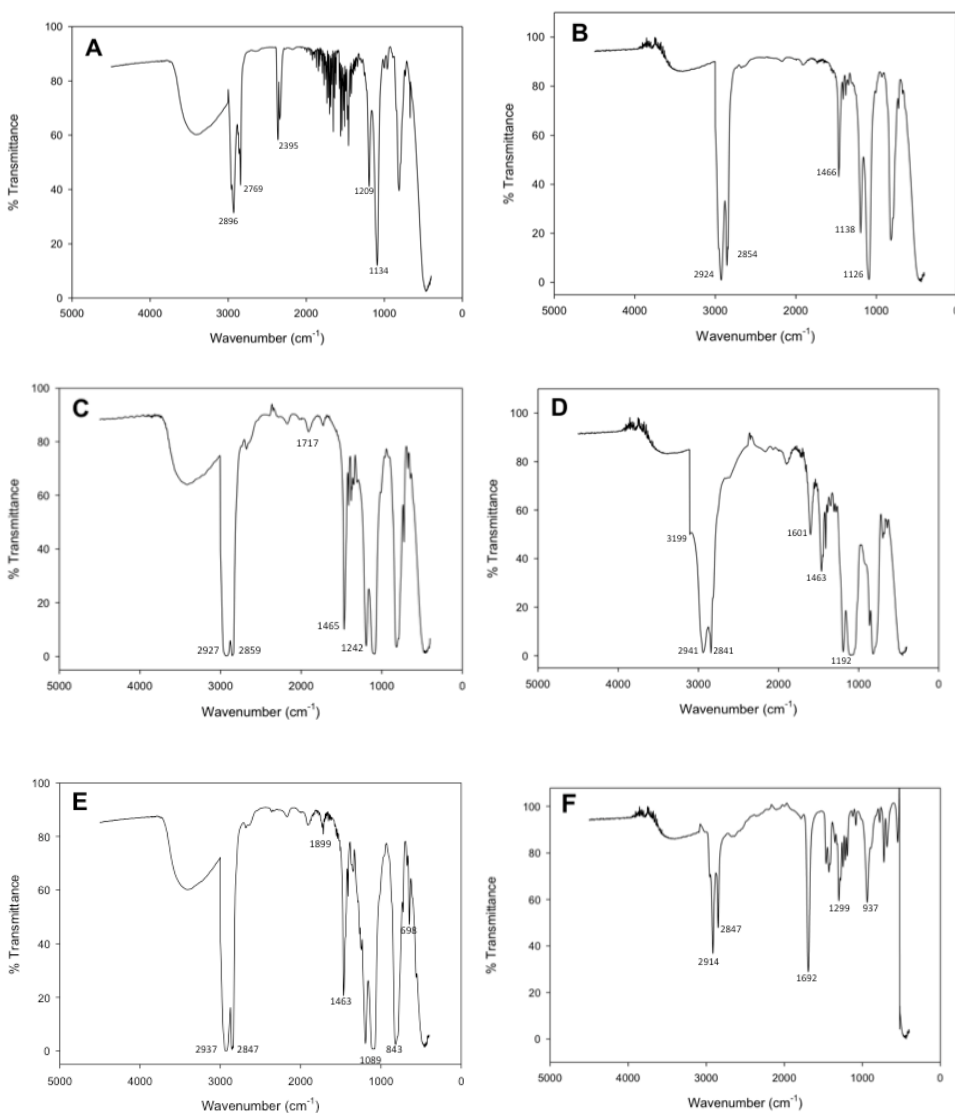

**Figure S3.** Schematic of the u-tube cell geometry.

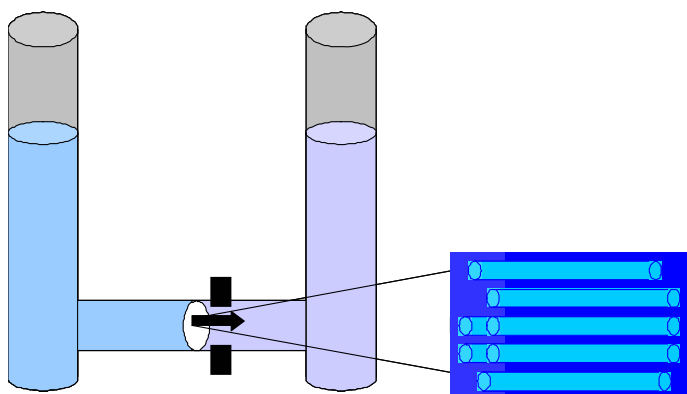

**Figure S4.** Plot of the flux of  $\text{CoF}_2\text{O}_4$  nanoparticles in hexane solutions across alumina membranes with 200 nm diameter pores and modified with the indicated alkyl silanes.

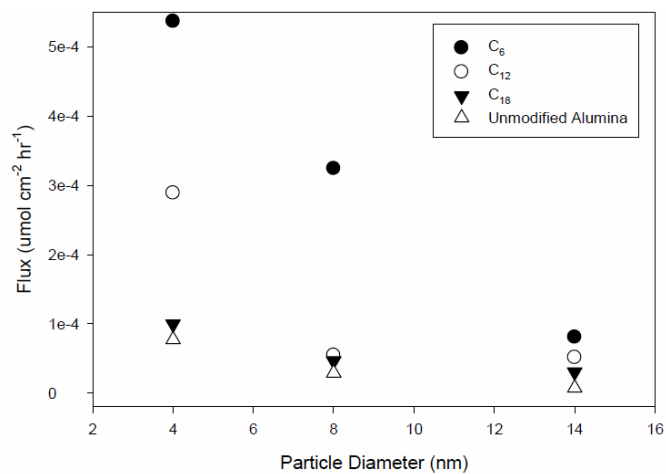

**Table S1.** Flux of nanoparticles through alumina membranes with 200 nm pore diameters

| CoFe <sub>2</sub> O <sub>4</sub><br>Nanoparticle<br>Diameter<br>(nm) | K <sub>p</sub> D Water (cm <sup>2</sup> /sec) x<br>10 <sup>-9</sup> |                                                  | K <sub>p</sub> D Hexane (cm <sup>2</sup> /sec)<br>x 10 <sup>-9</sup> |                                                  |
|----------------------------------------------------------------------|---------------------------------------------------------------------|--------------------------------------------------|----------------------------------------------------------------------|--------------------------------------------------|
|                                                                      | Unmodified<br>Alumina                                               | C <sub>12</sub><br>Silane<br>Modified<br>Alumina | Unmodified<br>Alumina                                                | C <sub>12</sub><br>Silane<br>Modified<br>Alumina |
| 4                                                                    | 11                                                                  | 44                                               | 90                                                                   | 360                                              |
| 8.5                                                                  | 24                                                                  | 225                                              | 70                                                                   | 120                                              |
| 14                                                                   | 21                                                                  | 84                                               | 27                                                                   | 107                                              |

**Table S2.** Flux through alumina membranes with 100 nm pore diameters in hexane solutions with indicated alkyl silane monolayers

| CoFe <sub>2</sub> O <sub>4</sub><br>Nanoparticle<br>Diameter<br>(nm) | K <sub>p</sub> D Hexane (cm <sup>2</sup> /sec) x 10 <sup>-9</sup> |    |                 |      |
|----------------------------------------------------------------------|-------------------------------------------------------------------|----|-----------------|------|
|                                                                      | C <sub>12</sub>                                                   | Br | NH <sub>2</sub> | COOH |
| 4 nm                                                                 | 5.9                                                               | 20 | 2.8             | 1.3  |
| 8.5 nm                                                               | 21                                                                | 28 | 1.5             | 1.6  |
| 14 nm                                                                | 8.0                                                               | 37 | 4.9             | 0.5  |

**Table S3.**  $K_pD$  values for  $\text{CoFe}_2\text{O}_4$  nanoparticles diffusing across alumina membranes with 200 nm diameter pores in water or hexane solutions with indicated silane monolayers.

| <b>CoFe<sub>2</sub>O<sub>4</sub><br/>Nanoparticle<br/>Diameter (nm)</b> | <b>K<sub>p</sub>D in Water (cm<sup>2</sup>/sec) x 10<sup>-6</sup></b> |           |                       |
|-------------------------------------------------------------------------|-----------------------------------------------------------------------|-----------|-----------------------|
|                                                                         | <b>C<sub>12</sub></b>                                                 | <b>Br</b> | <b>NH<sub>2</sub></b> |
| 4                                                                       | 1.9                                                                   | 0.96      | 0.90                  |
| 8.5                                                                     | 1.9                                                                   | 1.64      | 0.81                  |
| 14                                                                      | 1.6                                                                   | 0.93      | 0.31                  |
| <b>K<sub>p</sub>D in (cm<sup>2</sup>/sec) Hexane x 10<sup>-6</sup></b>  |                                                                       |           |                       |
|                                                                         | <b>C<sub>12</sub></b>                                                 | <b>Br</b> | <b>NH<sub>2</sub></b> |
| 4                                                                       | 27                                                                    | 16        | 3.7                   |
| 8.5                                                                     | 6.52                                                                  | 5.6       | 3.3                   |
| 14                                                                      | 2.2                                                                   | 2.0       | 1.4                   |
